# Supplementary material
Source: Springer Nature journal article supplement (https://www.springermedizin.de/resource/supplementary/13023_2013_735_MOESM4_ESM.pdf/9642928)

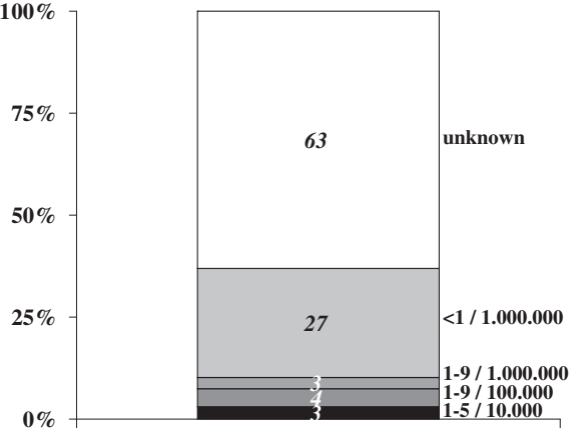

Supplement: MOESM4 [file 9642928]
